# Supplementary material for: Disease activity in psoriatic arthritis (PsA): defining remission and treatment success using the DAPSA score
Source: HighWire-hosted journal article supplement (doi:10.1136/annrheumdis-2015-207507), 2015-08-13

## Supplementary Figures

**Figure S1. DAPSA distribution of 30 patients selected for survey.** Each red dot represents one patient; x-axis displays DAPSA values.

***Figure S1.***

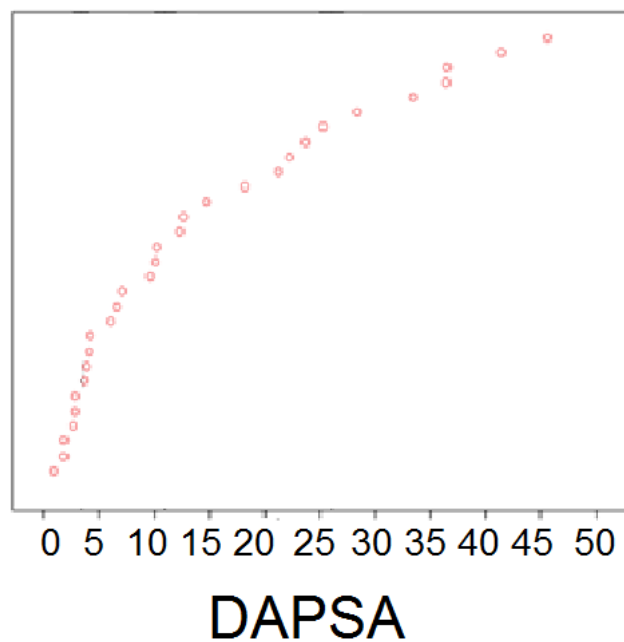

**Figure S2. Definition of response levels for the clinical DAPSA (cDAPSA); Cohen's Kappa analysis.** Agreement of cDAPSA percent change (x-axis) with ACR 20% (blue lines), ACR 50% (red lines), ACR 70% (green lines) and PsARC (brown lines) Upper panels show response after 3 months, lower panels: response after 6 months. Left panels display analyses of separate trials: ADEPT, GO-REVEAL and IMPACT. Right panels show pooled results of all treatment groups in three trials (N=425). Placebo groups were excluded in all analyses. X-axis: relative change of cDAPSA from baseline in percent; y-axis: Cohen's Kappa in comparison with the respective comparator. The table specifies the respective peak agreement between percent cDAPSA change from baseline (% change) on the one hand, and ACR20/50/70, or PsARC on the other;  $\kappa$ =Cohen's Kappa; BL=baseline. (Addendum to Figure 2 in main manuscript)

**Figure S2.**

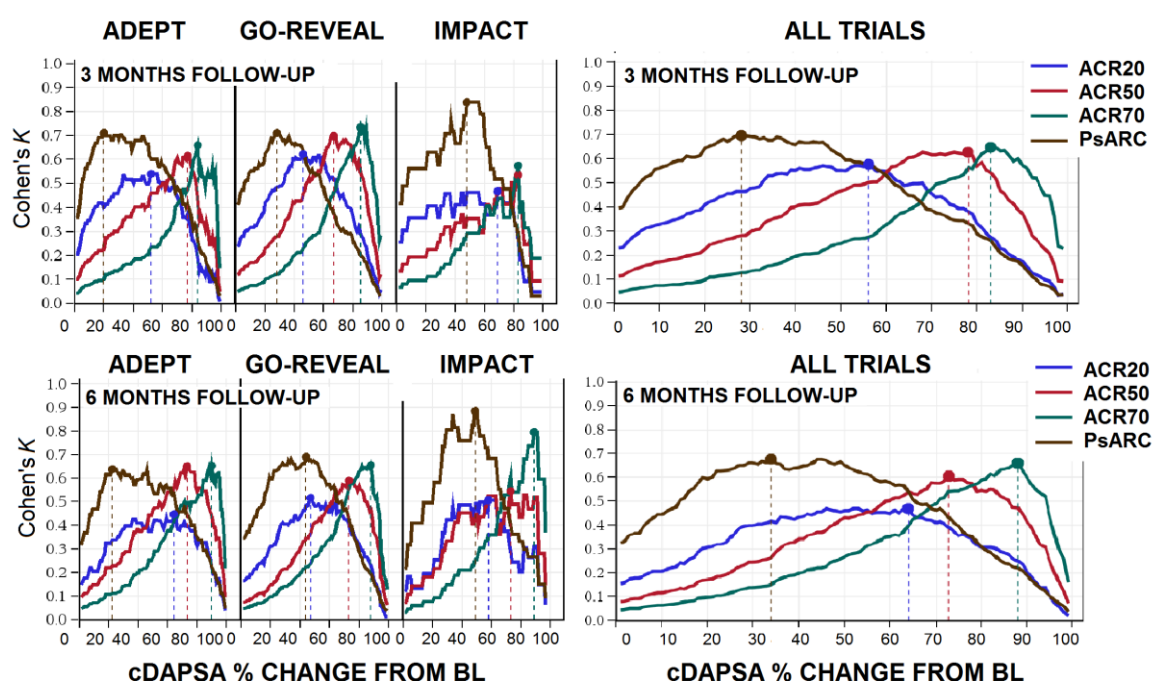

|             |       | ADEPT;<br>N=127 |      | GO-REVEAL;<br>N=255 |      | IMPACT;<br>N=43 |      | All trials;<br>N=425 |      |
|-------------|-------|-----------------|------|---------------------|------|-----------------|------|----------------------|------|
|             |       | %<br>change     | K    | %<br>change         | K    | %<br>change     | K    | %<br>change          | K    |
| 3<br>MONTHS | ACR20 | 52.0            | 0.54 | 46.0                | 0.62 | 69.0            | 0.47 | 56.0                 | 0.58 |
|             | ACR50 | 77.0            | 0.62 | 67.0                | 0.70 | 83.0            | 0.53 | 78.0                 | 0.63 |
|             | ACR70 | 84.0            | 0.66 | 85.0                | 0.73 | 83.0            | 0.57 | 83.0                 | 0.65 |
|             | PsARC | 20.0            | 0.71 | 28.0                | 0.71 | 48.0            | 0.84 | 28.0                 | 0.70 |
| 6<br>MONTHS | ACR20 | 64.0            | 0.45 | 47.0                | 0.52 | 58.0            | 0.50 | 64.0                 | 0.47 |
|             | ACR50 | 73.0            | 0.65 | 73.0                | 0.59 | 73.0            | 0.54 | 73.0                 | 0.60 |
|             | ACR70 | 90.0            | 0.65 | 88.0                | 0.65 | 89.0            | 0.79 | 88.0                 | 0.66 |
|             | PsARC | 22.0            | 0.64 | 44.0                | 0.69 | 49.0            | 0.88 | 34.0                 | 0.68 |

**Figure S3. Discriminant validity of cutpoints in Chi-square analysis:** separate analyses of ADEPT, IMPACT and GO-REVEAL. (Addendum to *Figure 4* in main manuscript). Chi-square tests for each DAPSA cutpoint as a measure of strength of discrimination between response in treatment and placebo arms. X-axis displays DAPSA percent change from baseline. Panels show analyses of ADEPT (upper panels), IMPACT (middle) and GO-REVEAL (lower panels). Y-axis indicates p values of Chi-square analyses. Vertical lines indicate newly established cutpoints at DAPSA thresholds of 50/75/85 percent change from baseline: results of Chi-square tests for the derived thresholds for a DAPSA change of 50%, 75%, and 85% after 3 months, and after 6 months are specified (green numbers); y-axis shows corresponding p-values; BL=baseline.

**Figure S3.**

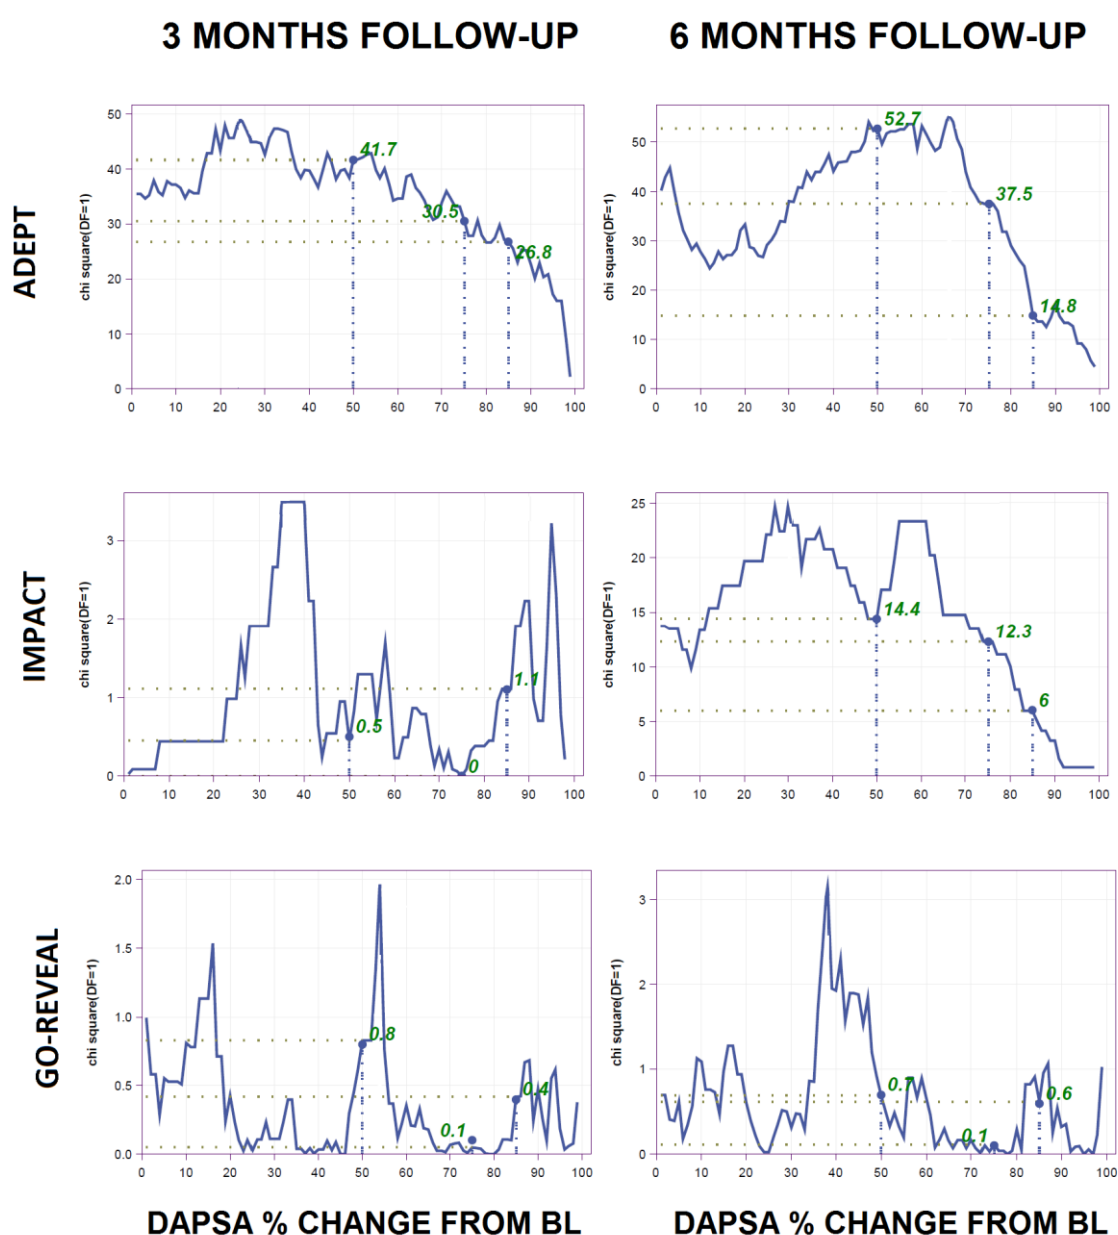

**Figure S4. ROC analyses of DAPSA relative change in relation to the corresponding ACR-response definition.** Area under the curve in receiver operating curves (ROC) analyses comparing DAPSA relative change after 6 months with ACR20 (left panel), ACR50 (middle panel), ACR70 (right panel). X-axis shows the rate of false positives (=1-specificity), y-axis shows true positive rate (sensitivity).

**Figure S4.**

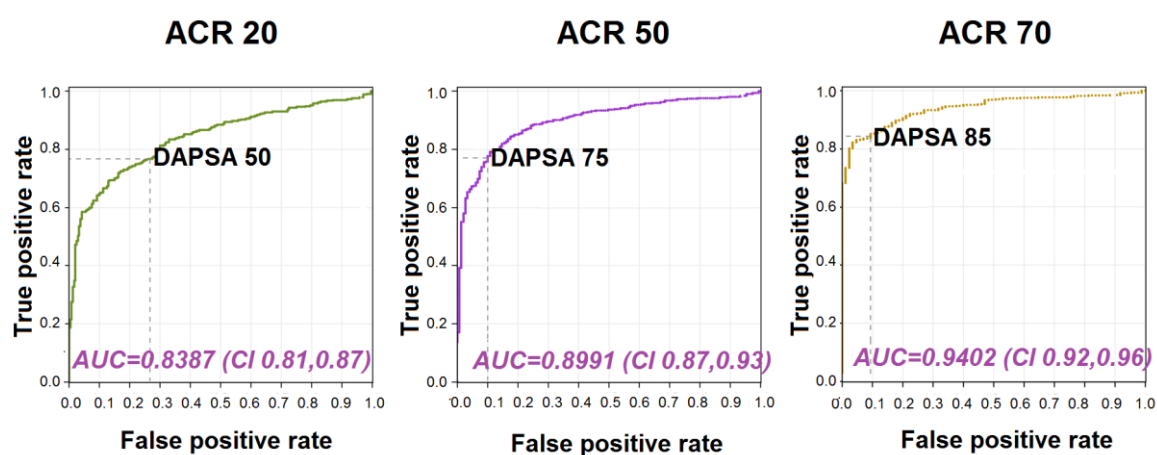

Supplement: annrheumdis-2015-207507supp_figures.pdf [file annrheumdis-2015-207507supp_figures.pdf]
